# Supplementary material
Source: PubMed Central journal article supplement (PMC5898607)
Supplement: NIHMS77084-supplement-Supplementary_Figures.pdf [file NIHMS77084-supplement-Supplementary_Figures.pdf]

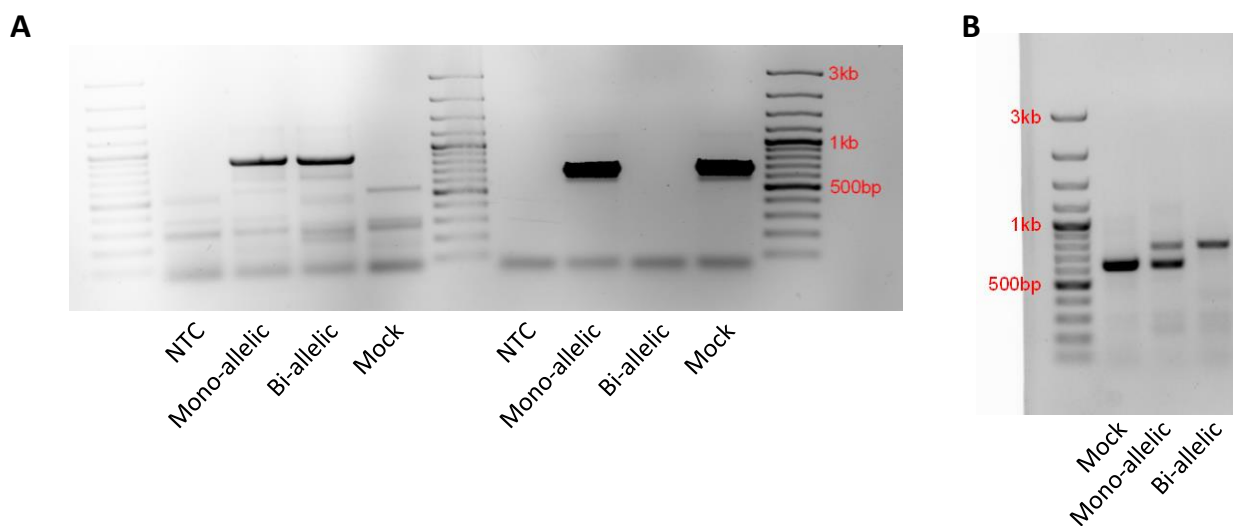

**Supplemental Figure 1. Genotyping of methylcellulose colonies (A)** Uncropped images of the genotyping gels presented in Extended Data Figure 4B. **(B)** Uncropped image of the genotyping gel presented in Extended Data Figure 4E.

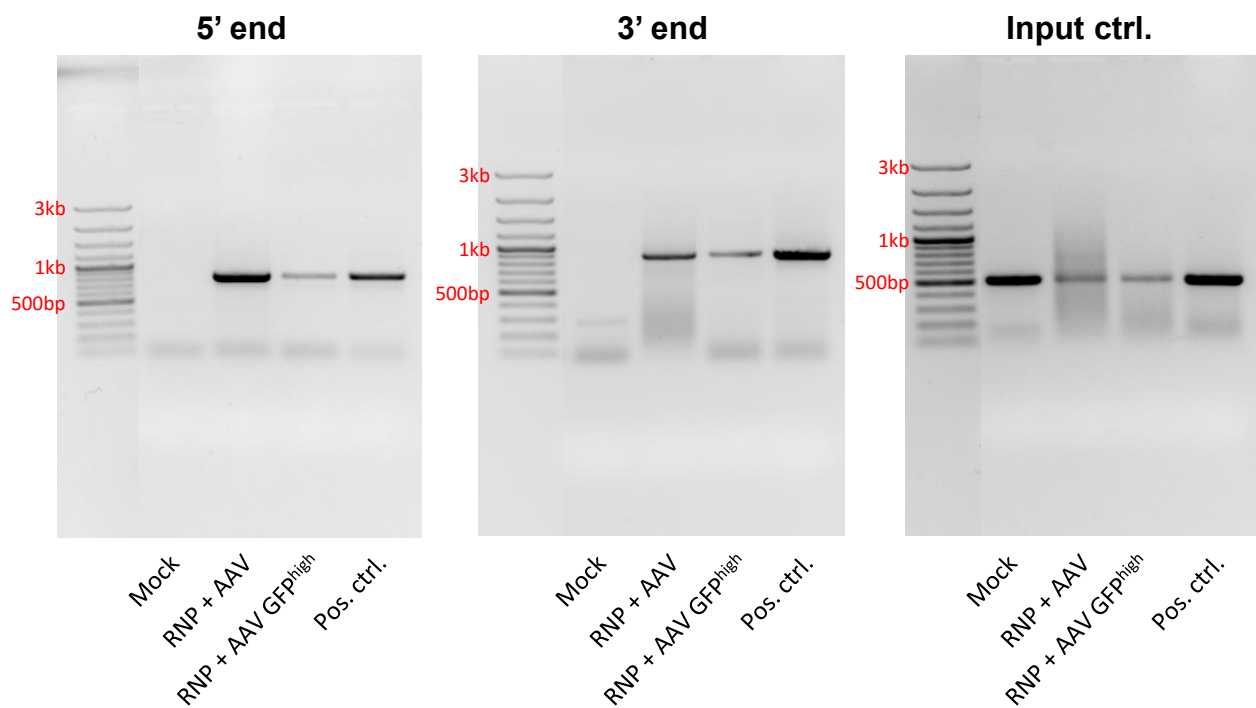

**Supplemental Figure 2. Confirming on-target integration in human cells from secondary transplanted mice.** Uncropped images of the gels presented in Figure 3e.
